# Supplementary material for: Identification of Learning Mechanisms in a Wild Meerkat Population
Source: PubMed Central journal article supplement (PMC3414518; doi:10.1371/journal.pone.0042044), 2012-08-08
Supplement: pone.0042044.s005.pdf [file pone.0042044.s005.pdf]

| Effect                                                                     | Mean   | Median  | SD     | 95% credible interval (HPD) | Posterior probability ( $\leq 0$ ) |
|----------------------------------------------------------------------------|--------|---------|--------|-----------------------------|------------------------------------|
| <b>Specific local enhancement:</b>                                         |        |         |        |                             |                                    |
| Adults ( $\theta_{SLE}$ )                                                  | 4.1E-4 | 3.4E-4  | 9.0E-4 | [-0.0012, 0.0022]           | 0.342                              |
| Juveniles & Sub-adults ( $\theta_{SLE,juvsub}$ )                           | 0.0050 | 0.0050  | 0.0012 | [0.0028, 0.0074]            | <b>&lt;0.001</b>                   |
| Pups ( $\theta_{SLE,pup}$ )                                                | 0.0036 | 0.0035  | 0.0011 | [0.0016, 0.0057]            | <b>&lt;0.001</b>                   |
| Contrast ( $\theta_{SLE,juvsub} - \theta_{SLE}$ )                          | 0.0046 | 0.0045  | 0.0014 | [0.0019, 0.0074]            | <b>&lt;0.001</b>                   |
| Contrast ( $\theta_{SLE,pup} - \theta_{SLE}$ )                             | 0.0032 | 0.0031  | 0.0013 | [7.1E-4, 0.0060]            | <b>0.007</b>                       |
| Contrast ( $\theta_{SLE,juvsub} - \theta_{SLE,pup}$ )                      | 0.0014 | 0.0014  | 0.0014 | [-0.0015, 0.0043]           | 0.154                              |
| <b>Box-level local enhancement:</b>                                        |        |         |        |                             |                                    |
| Adults & Pups ( $\theta_{BLE}$ )                                           | 9.0E-4 | 8.5E-4  | 4.4E-4 | [1.1E-4, 0.0018]            | <b>0.001</b>                       |
| Juveniles & Sub-adults ( $\theta_{BLE,juvsub}$ )                           | 2.1E-4 | 1.6E-4  | 1.8E-4 | [-2.0E-7, 5.6E-4]           | <b>0.001</b>                       |
| Contrast ( $\theta_{BLE} - \theta_{BLE,juvsub}$ )                          | 7.0E-4 | 6.4E-4  | 4.2E-4 | [-2.2E-5, 0.0016]           | <b>0.018</b>                       |
| <b>General effect:</b>                                                     |        |         |        |                             |                                    |
| Adults & pups ( $\theta_{GE}$ )                                            | 1.7E-4 | 1.4E-4  | 4.7E-4 | [0, 4.5E-4]                 |                                    |
| Juveniles & Sub-adults ( $\theta_{GE,juvsub}$ )                            | 3.6E-5 | 2.2E-5  | 4.3E-5 | [0, 6.3E-5]                 |                                    |
| Contrast ( $\theta_{GE} - \theta_{GE,juvsub}$ )                            | 1.4E-4 | 1.1E-4  | 1.3E-4 | [-3.7E-6, 4.0E-4]           | <b>0.017</b>                       |
| <b>Half-life of transient effect (secs) (<math>\log(2) / \beta</math>)</b> | 20     | 20      | 4.5    | [12, 29]                    |                                    |
| <b>Direct social learning rate:</b>                                        |        |         |        |                             |                                    |
| Option-specific (s)                                                        | 0.0035 | 0.0035  | 6.6E-4 | [0.0017, 0.0055]            |                                    |
| Cross-option ( $s_{cross}$ )                                               | 0.0013 | 0.0012  | 9.9E-4 | [1.0E-4, 0.0026]            |                                    |
| Contrast ( $s - s_{cross}$ )                                               | 0.0022 | 0.0022  | 1.2E-3 | [-1.1E-4, 0.0045]           | 0.027                              |
| <b>Asocial learning rate</b>                                               |        |         |        |                             |                                    |
| Subordinates ( $\alpha$ )                                                  | 0.051  | 0.051   | 5.7E-3 | [0.040, 0.063]              |                                    |
| Dominants ( $\alpha_{dom}$ )                                               | 4.2E-4 | 5.5E-12 | 3.8E-3 | [0, 9.9E-4]                 |                                    |
| Contrast ( $\alpha - \alpha_{dom}$ )                                       | 0.036  | 0.035   | 0.013  | [0.013, 0.060]              | <b>0.002</b>                       |
| <b>Effect of learning (<math>\omega</math>):</b>                           |        |         |        |                             |                                    |
| <b>Baseline rate effects (on scale of linear predictor):</b>               |        |         |        |                             |                                    |
| Flap $\mu_1$                                                               | -13    | -13     | 0.52   | [-14, -12]                  |                                    |
| Difference between flap and tube ( $\mu_2 - \mu_1$ )                       | 0.81   | 0.81    | 0.23   | [0.37, 1.3]                 | <b>&lt;0.001</b>                   |
| Male effect ( $\kappa_{male}$ )                                            | 1.09   | 1.08    | 0.47   | [0.18, 2.0]                 | <b>0.009</b>                       |

**Table S1:** Descriptive statistics of MCMC samples of the posterior distribution for parameters and contrasts in the final model. 95% credible intervals are highest posterior density (HPD). Where relevant the posterior probability is given that the parameter or contrast  $\leq 0$ . These are not given in cases where parameters were constrained to be  $>0$  or where the hypothesis  $=0$  is of no interest. Posterior probabilities are given to 3 d.p and in bold when  $<0.025$ . All other figures are given to 3 sig. figs
